# Supplementary material for: Lessons for future clinical trials in adults with Becker muscular dystrophy: Disease progression detected by muscle magnetic resonance imaging, clinical and patient‐reported outcome measures
Source: PubMed Central journal article supplement — Eur J Neurol. 2024 Mar 20;31(7):e16282. doi: 10.1111/ene.16282 (PMC11235693; doi:10.1111/ene.16282), 2024-03-20
Supplement: ENE-31-e16282-s001.pdf [file ENE-31-e16282-s001.pdf]

## Supplementary Figure 1

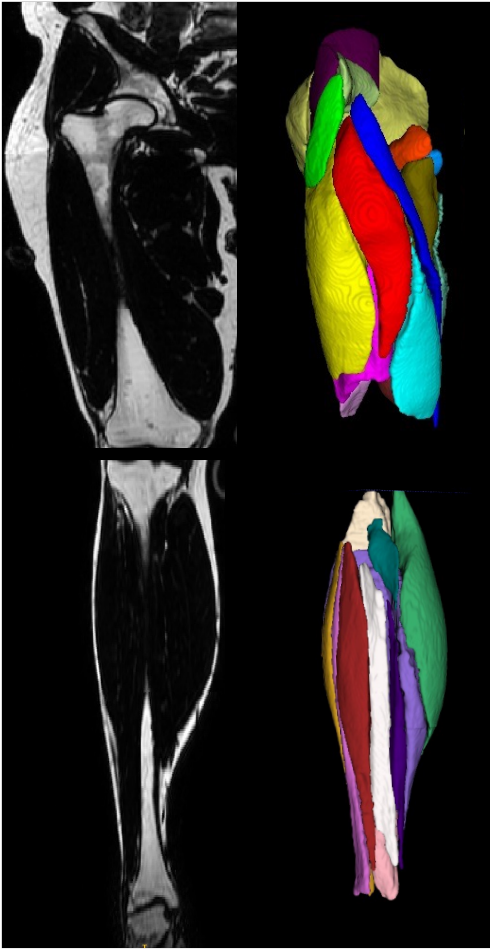

Coronal Dixon MRI fat images of the right upper and lower leg, with 3D muscle segmentation maps.
